# Supplementary material
Source: PubMed Central journal article supplement (PMC7546431)
Supplement: NIHMS1027447-supplement-1.pdf [file NIHMS1027447-supplement-1.pdf]

## Supporting Information

### A Tumor-on-a-Chip System with Bioprinted Blood and Lymphatic Vessel Pair

*Xia Cao, Ramla Ashfaq, Feng Cheng, Sushila Maharjan Jun Li, Guoliang Ying, Shabir Hassan, Haiyan Xiao, Kan Yue, Yu Shrike Zhang\**

Prof. Xia Cao, Dr. Ramla Ashfaq, Dr. Feng Cheng, Dr. Sushila Maharjan, Dr. Jun Li, Dr. Guoliang Ying, Dr. Shabir Hassan, Prof. Yu Shrike Zhang  
Division of Engineering in Medicine, Brigham and Women's Hospital; Department of Medicine, Harvard Medical School Cambridge, MA, 02139  
\*E-mail: [yszhang@research.bwh.harvard.edu](mailto:yszhang@research.bwh.harvard.edu)

Prof. Xia Cao  
Department of Pharmaceutics and Tissue Engineering, School of Pharmacy, Jiangsu University, Zhenjiang 212013, P.R. China

Dr. Ramla Ashfaq  
National Center of Excellence in Molecular Biology, University of the Punjab, 87 West Canal Bank Rd, Thokar Niaz Baig, Lahore 53700, Pakistan

Dr. Haiyan Xiao, Prof. Kan Yue  
South China Advanced Institute for Soft Matter Science and Technology, School of Molecular Science and Engineering, South China University of Technology, Guangzhou 510640, P.R. China  
State Key Laboratory of Luminescent Materials and Devices, South China University of Technology, Guangzhou 510640, P.R. China

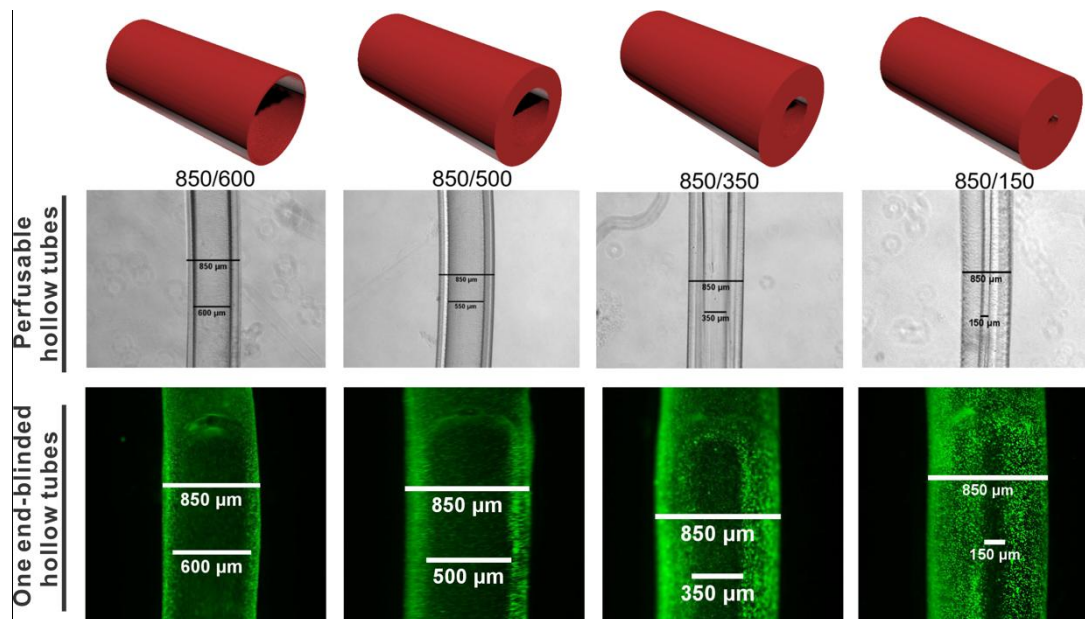

**Figure S1.** The different wall thicknesses in the bioprinted perfusable hollow tubes and one end-blinded hollow tubes.

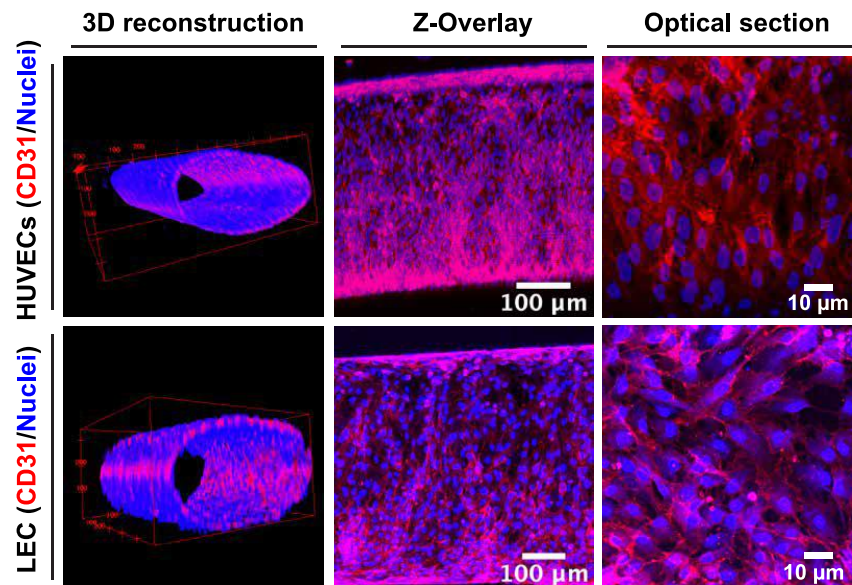

**Figure S2.** Endothelialization of the bioprinted blood and lymphatic vessels after 4 days of culture.

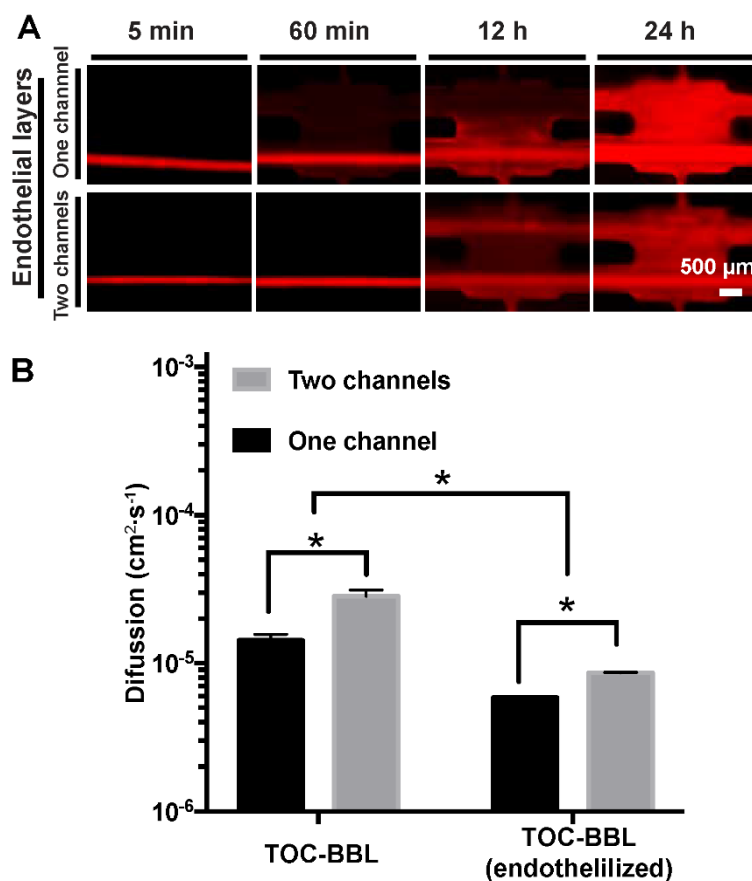

**Figure S3.** Drug transport in the endothelial layers. A) FITC with different molecular weights were examined for their diffusion profiles in the TOC-BBL under the two-channel configuration. B) The diffusions of DOX was examined in one-/two-channel configurations in the HUVECs/LEC seeded tubes formed chips. C) The comparisons of diffusion constants of DOX measured in the TOC-BBL and endothelial layers. \*  $P < 0.01$ .

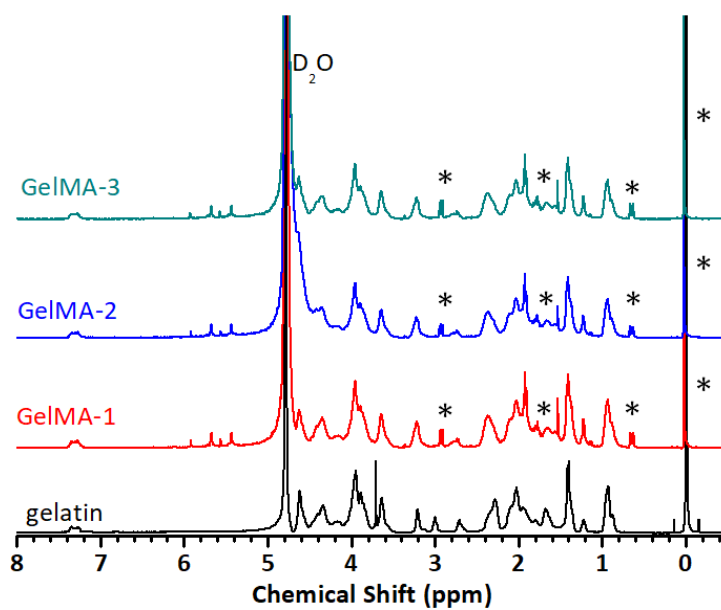

**Figure S4.**  $^1\text{H}$  NMR spectra of gelatin and GelMA samples. GelMA-1, GelMA-2, and GelMA-3 were three parallel samples.
